# Supplementary material for: Appraising the role of previously reported risk factors in epithelial ovarian cancer risk: A Mendelian randomization analysis
Source: PubMed Central journal article supplement (PMC6685606; doi:10.1371/journal.pmed.1002893), 2019-08-07

MR Test

Inverse variance weighted

Weighted median

MR Egger

Weighted mode

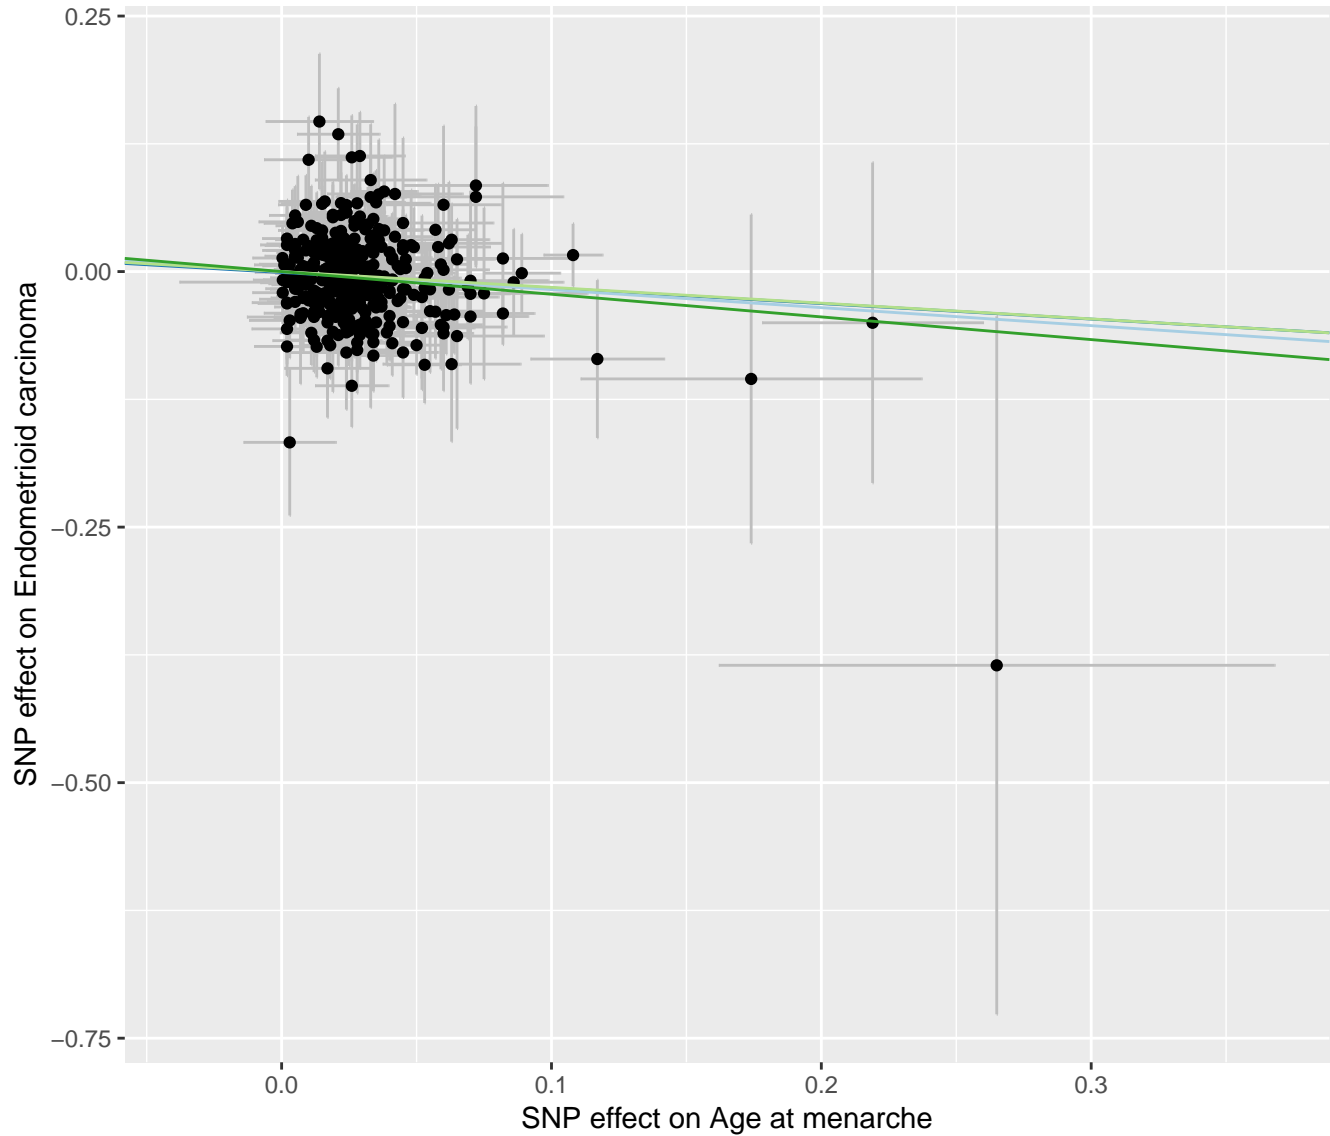

MR Test

Inverse variance weighted

Weighted median

MR Egger

Weighted mode

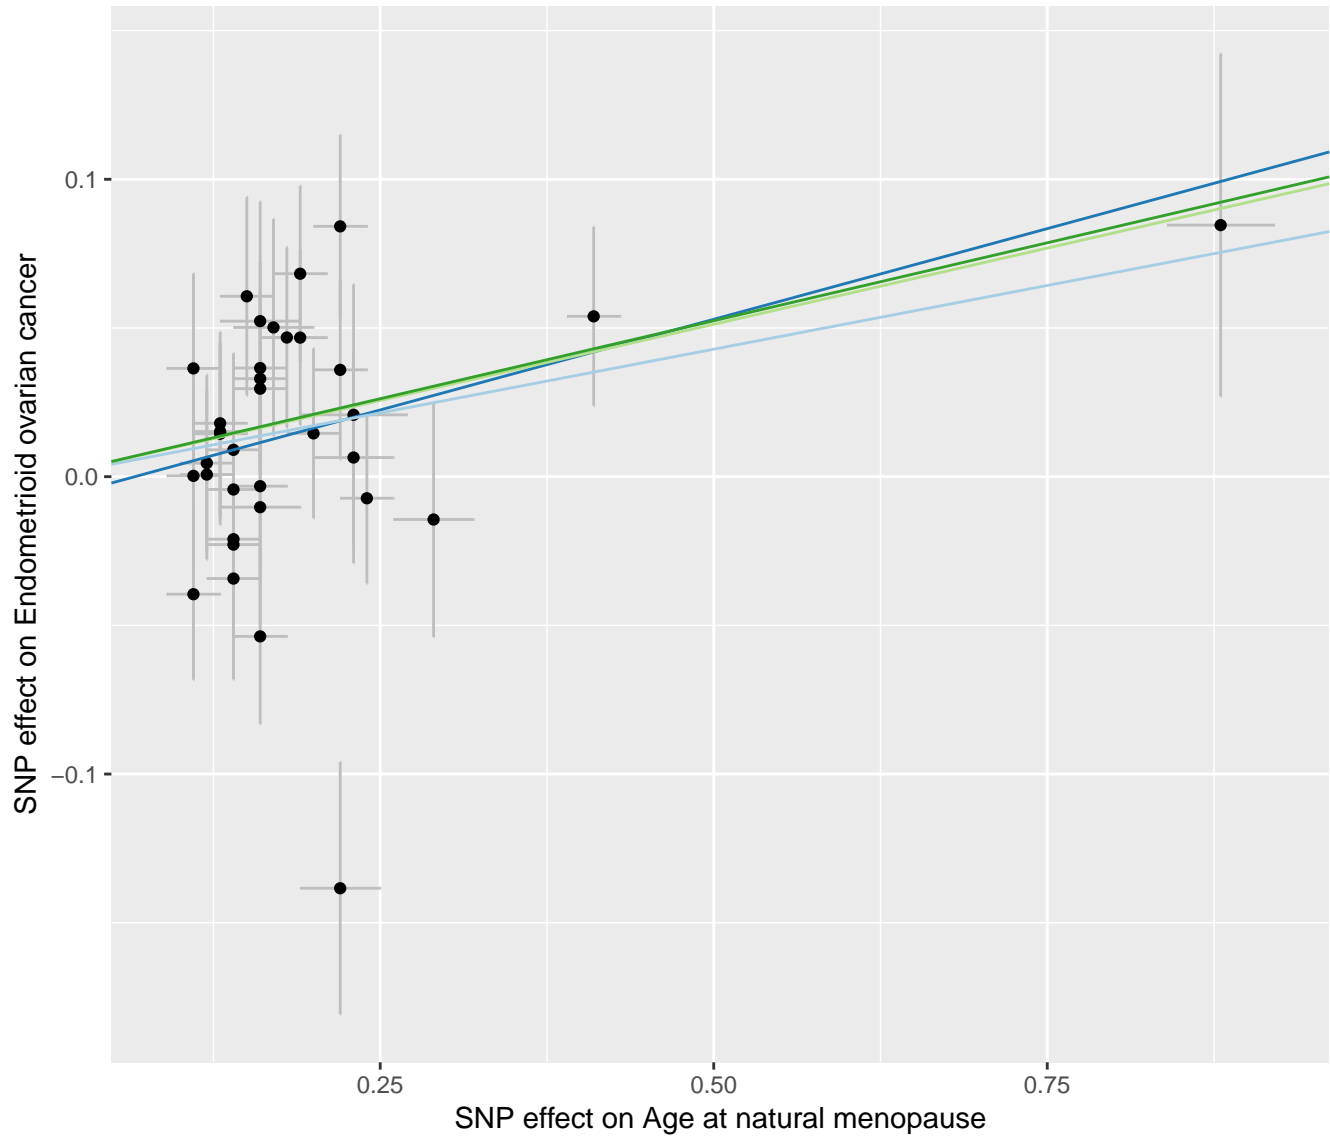

MR Test

Inverse variance weighted

Weighted median

MR Egger

Weighted mode

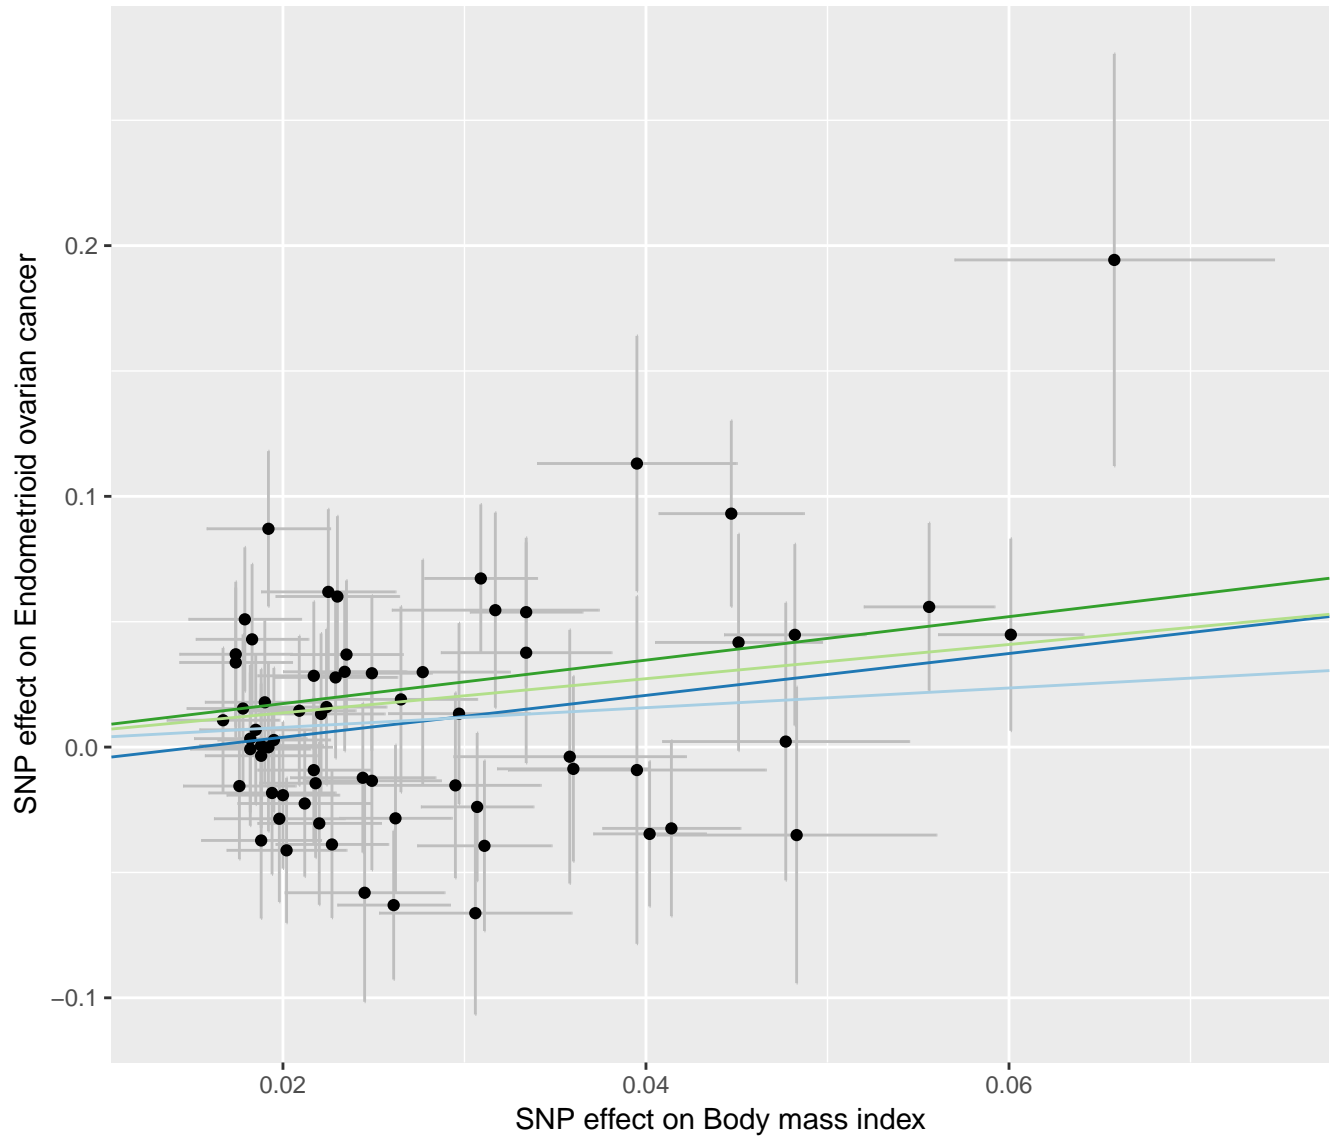

MR Test

Inverse variance weighted

Weighted median

MR Egger

Weighted mode

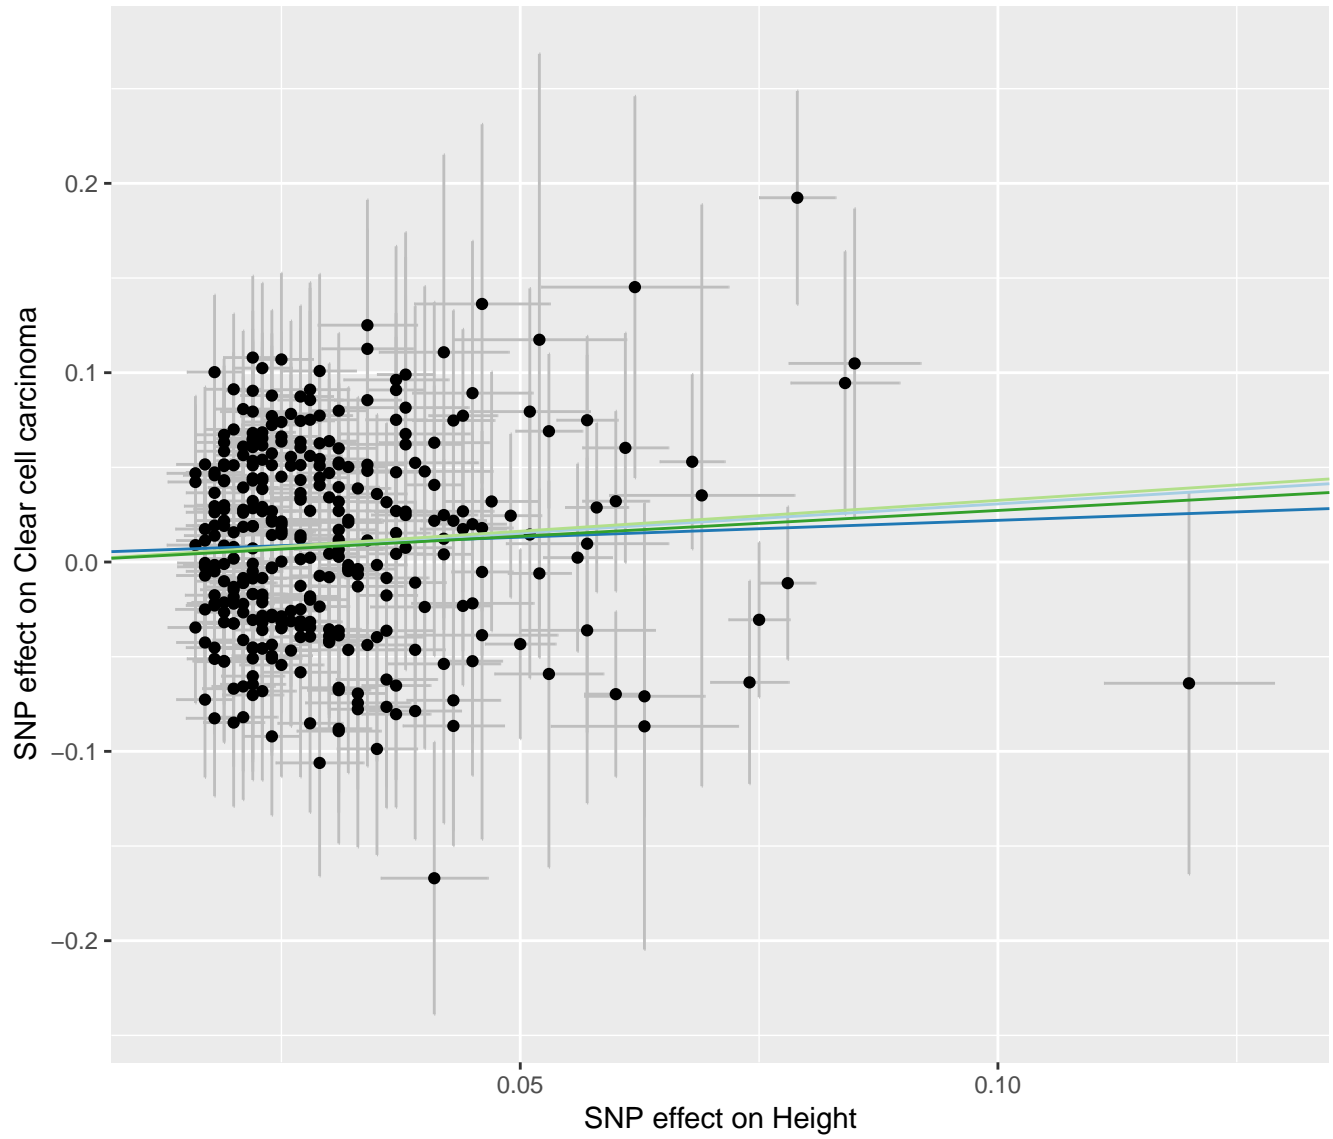

MR Test

- Inverse variance weighted
- MR Egger
- Weighted median
- Weighted mode

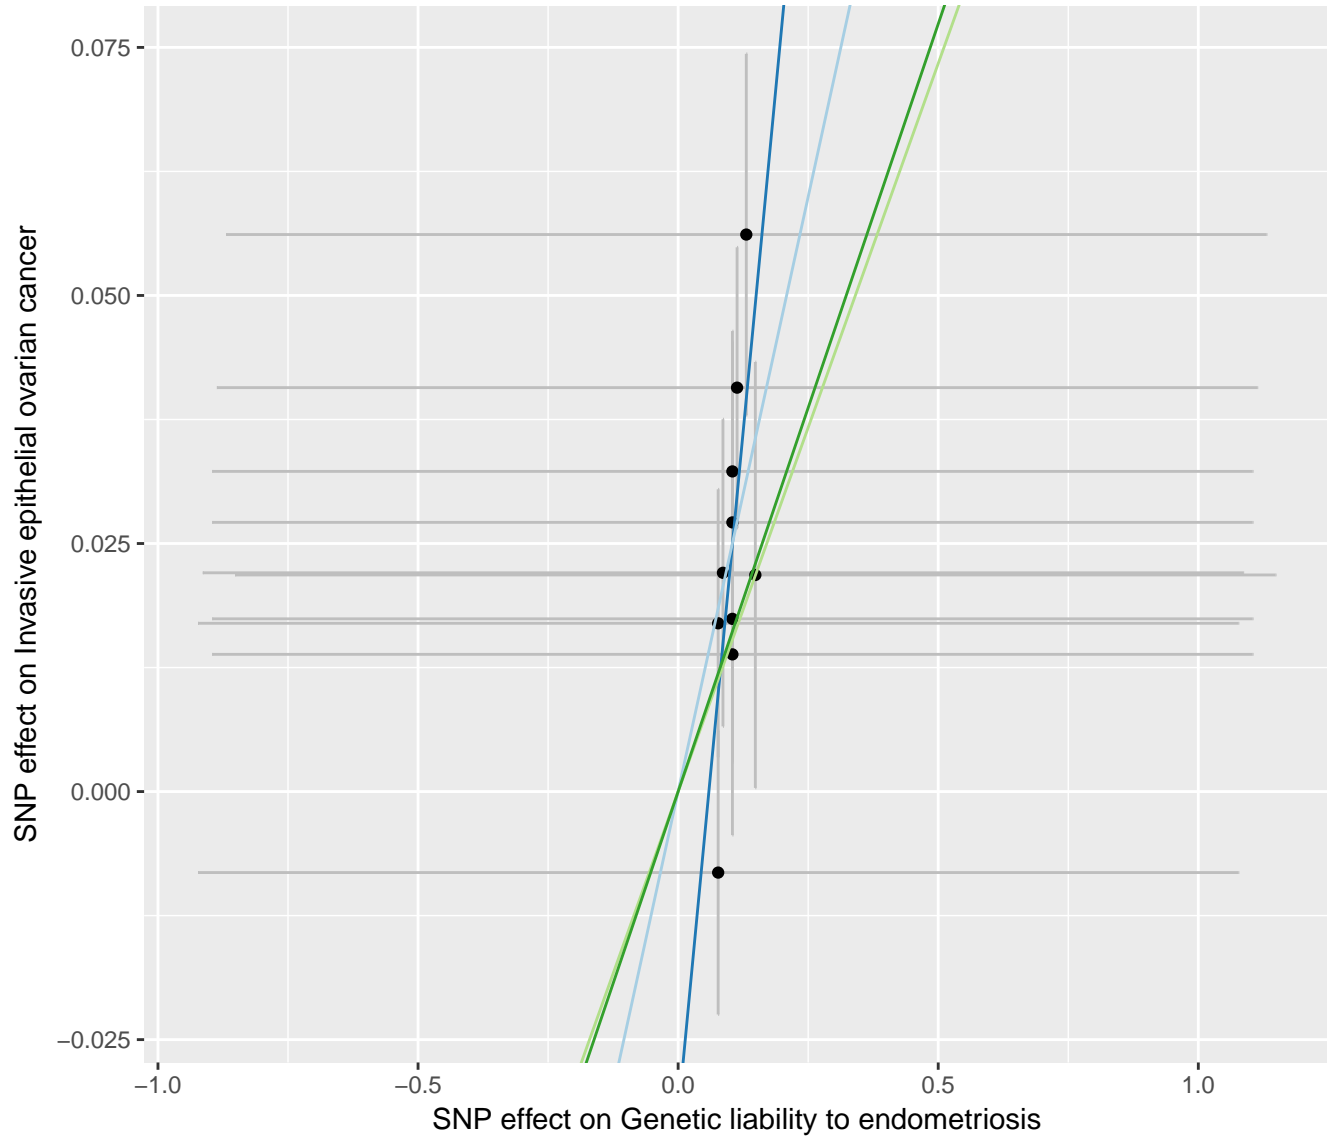

MR Test

Inverse variance weighted

Weighted median

MR Egger

Weighted mode

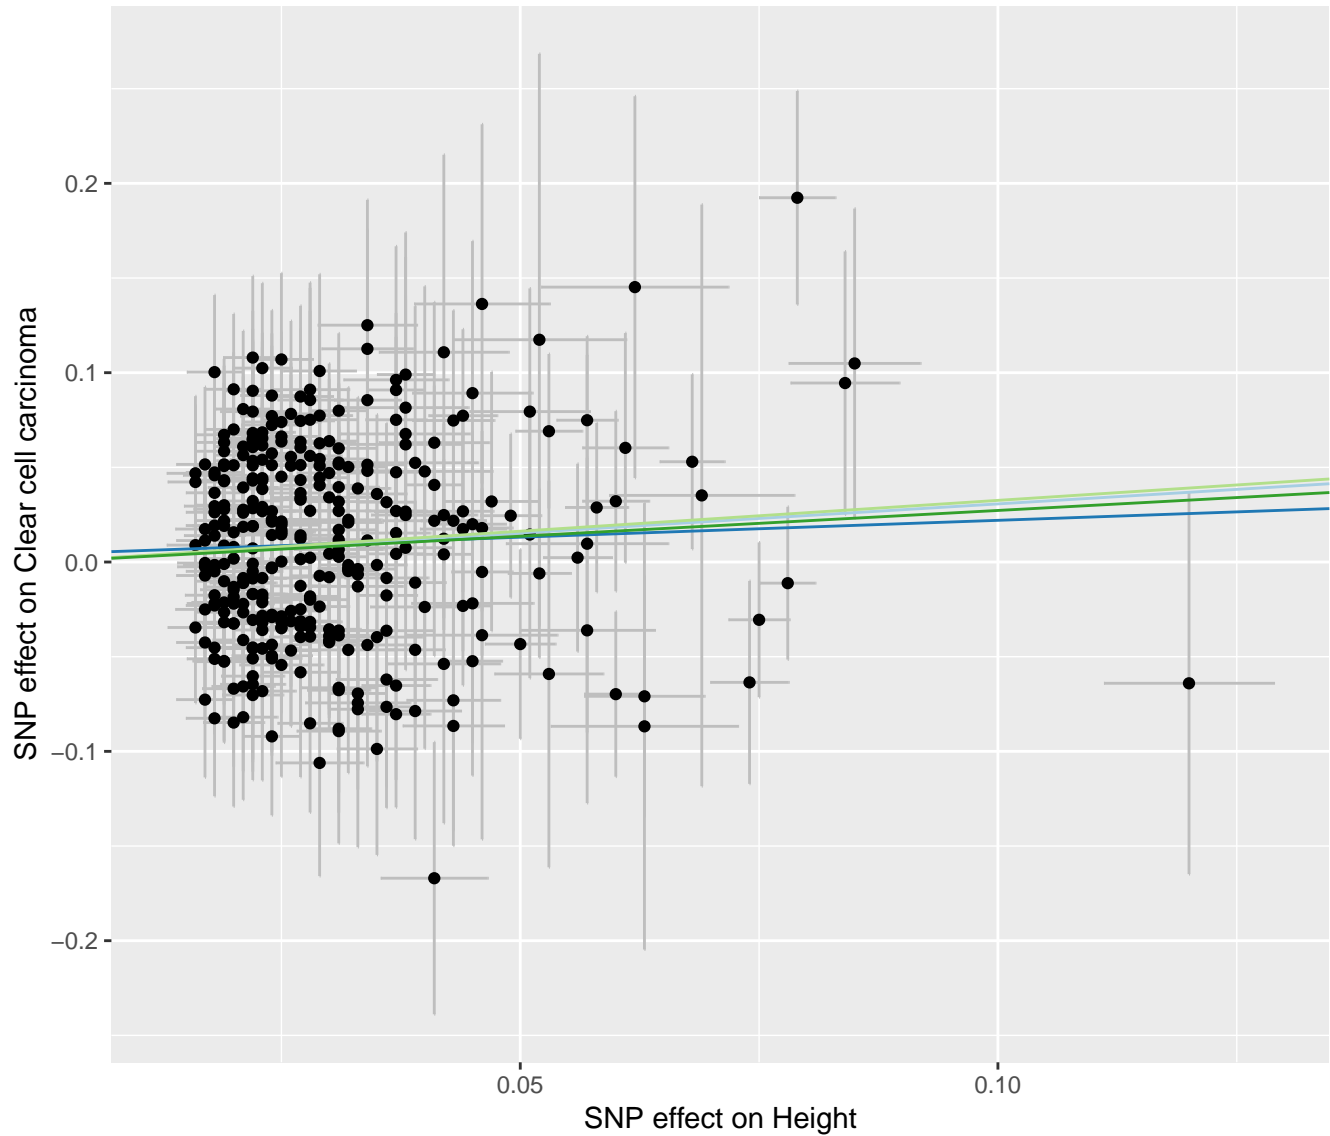

MR Test

- Inverse variance weighted
- MR Egger
- Weighted median
- Weighted mode

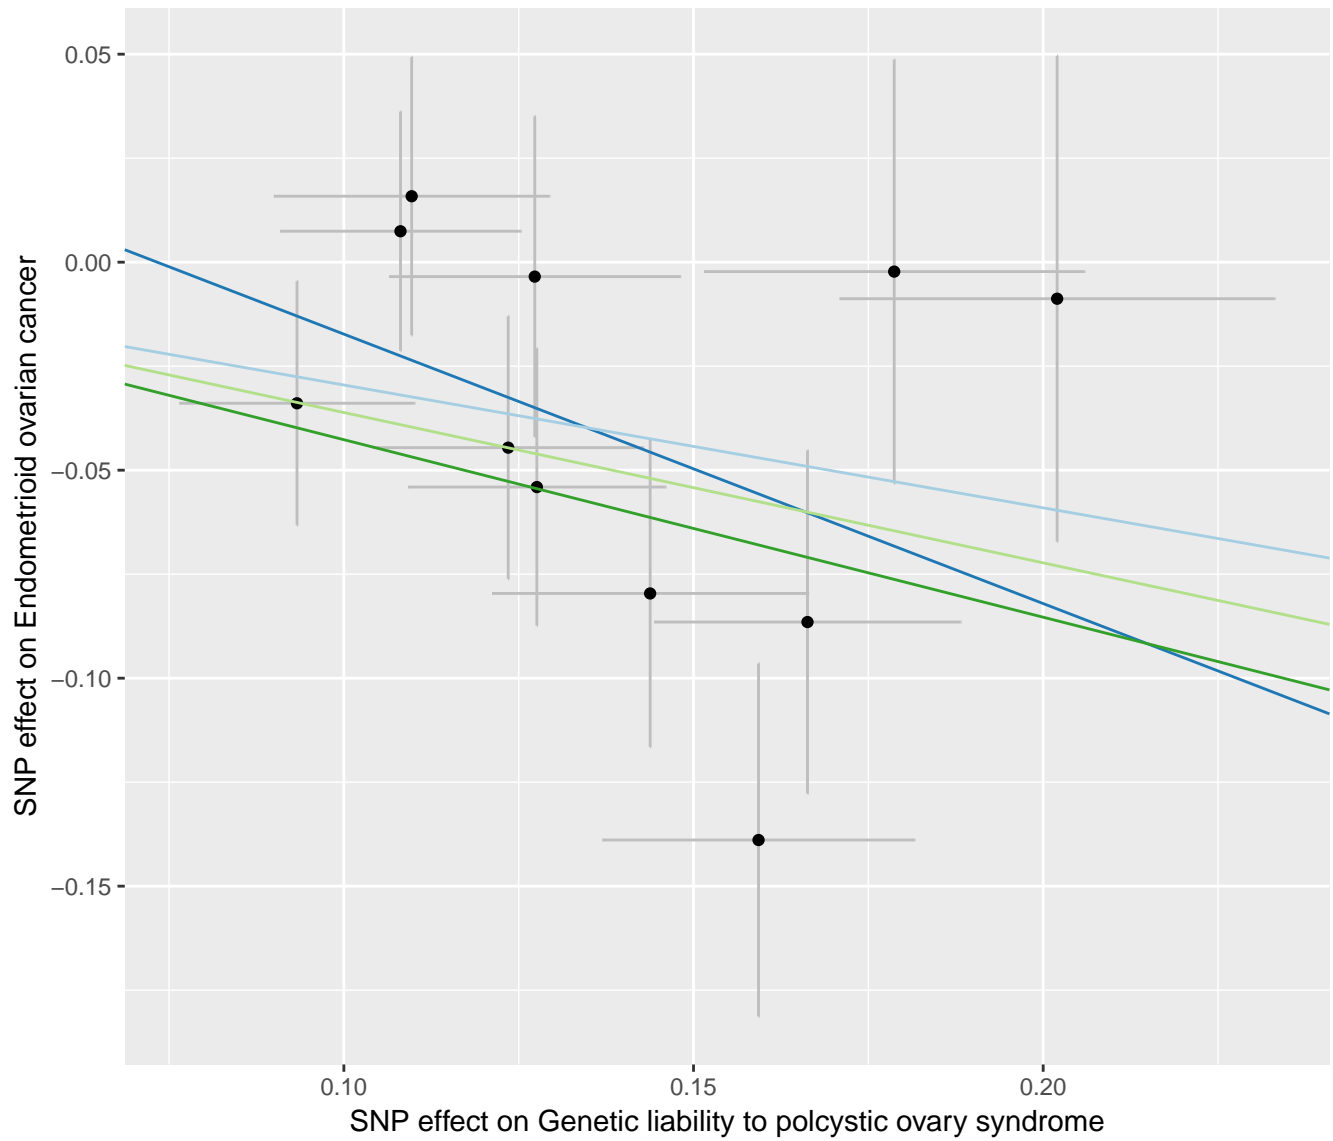

MR Test

- Inverse variance weighted
- MR Egger
- Weighted median
- Weighted mode

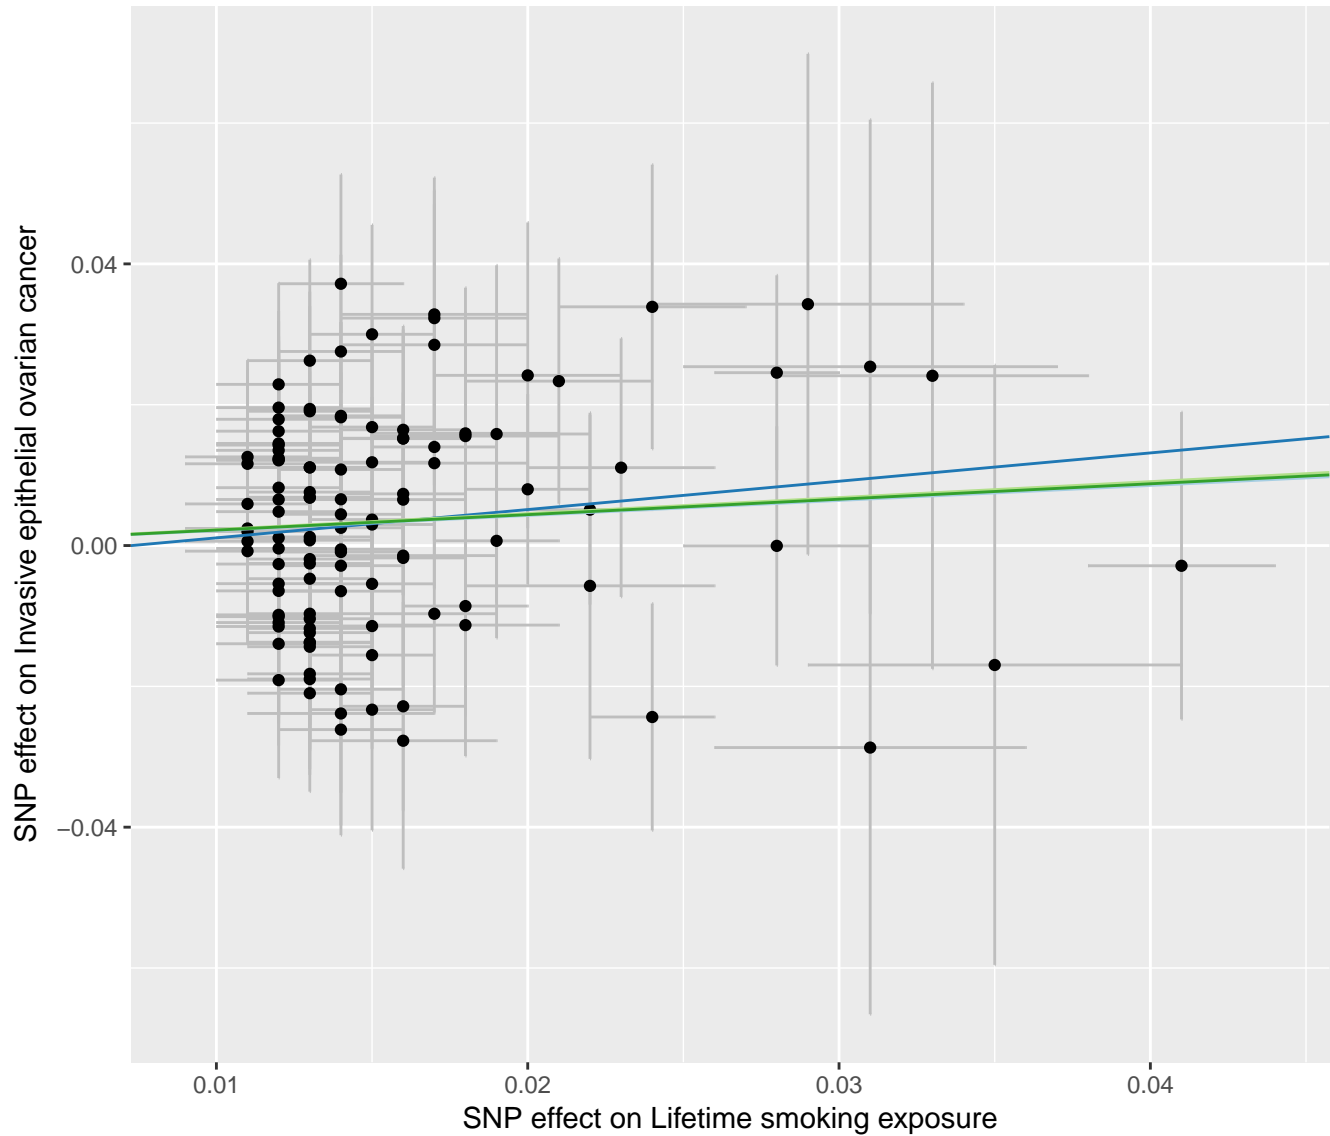



MR Test

- Inverse variance weighted
- MR Egger
- Weighted median
- Weighted mode

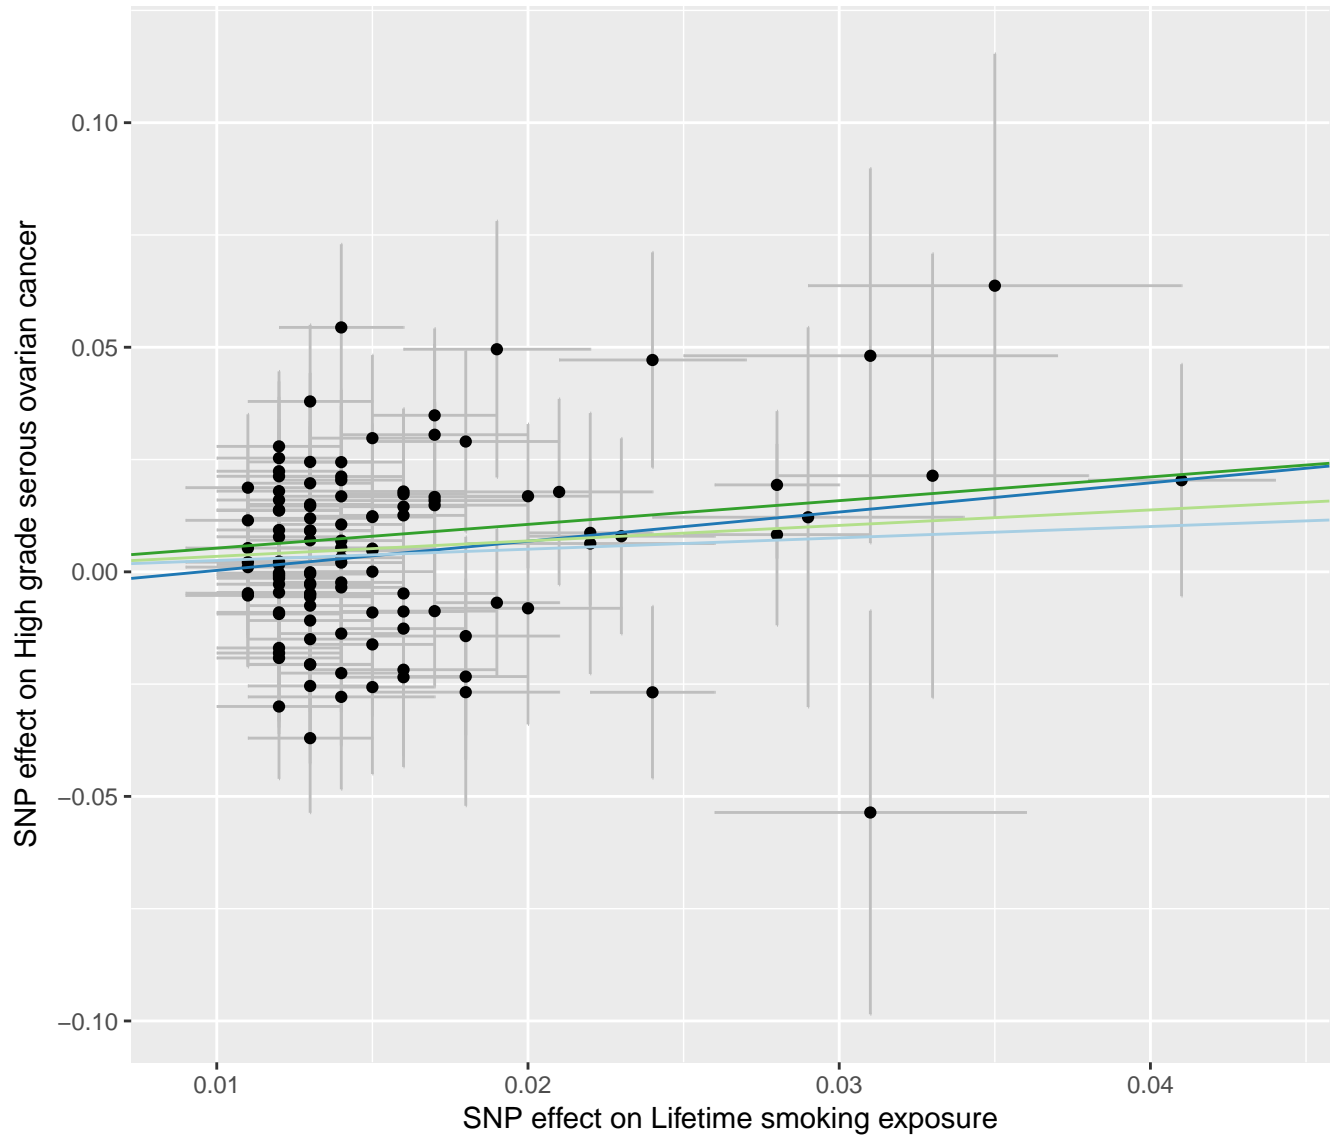

MR Test

- Inverse variance weighted
- MR Egger
- Weighted median
- Weighted mode

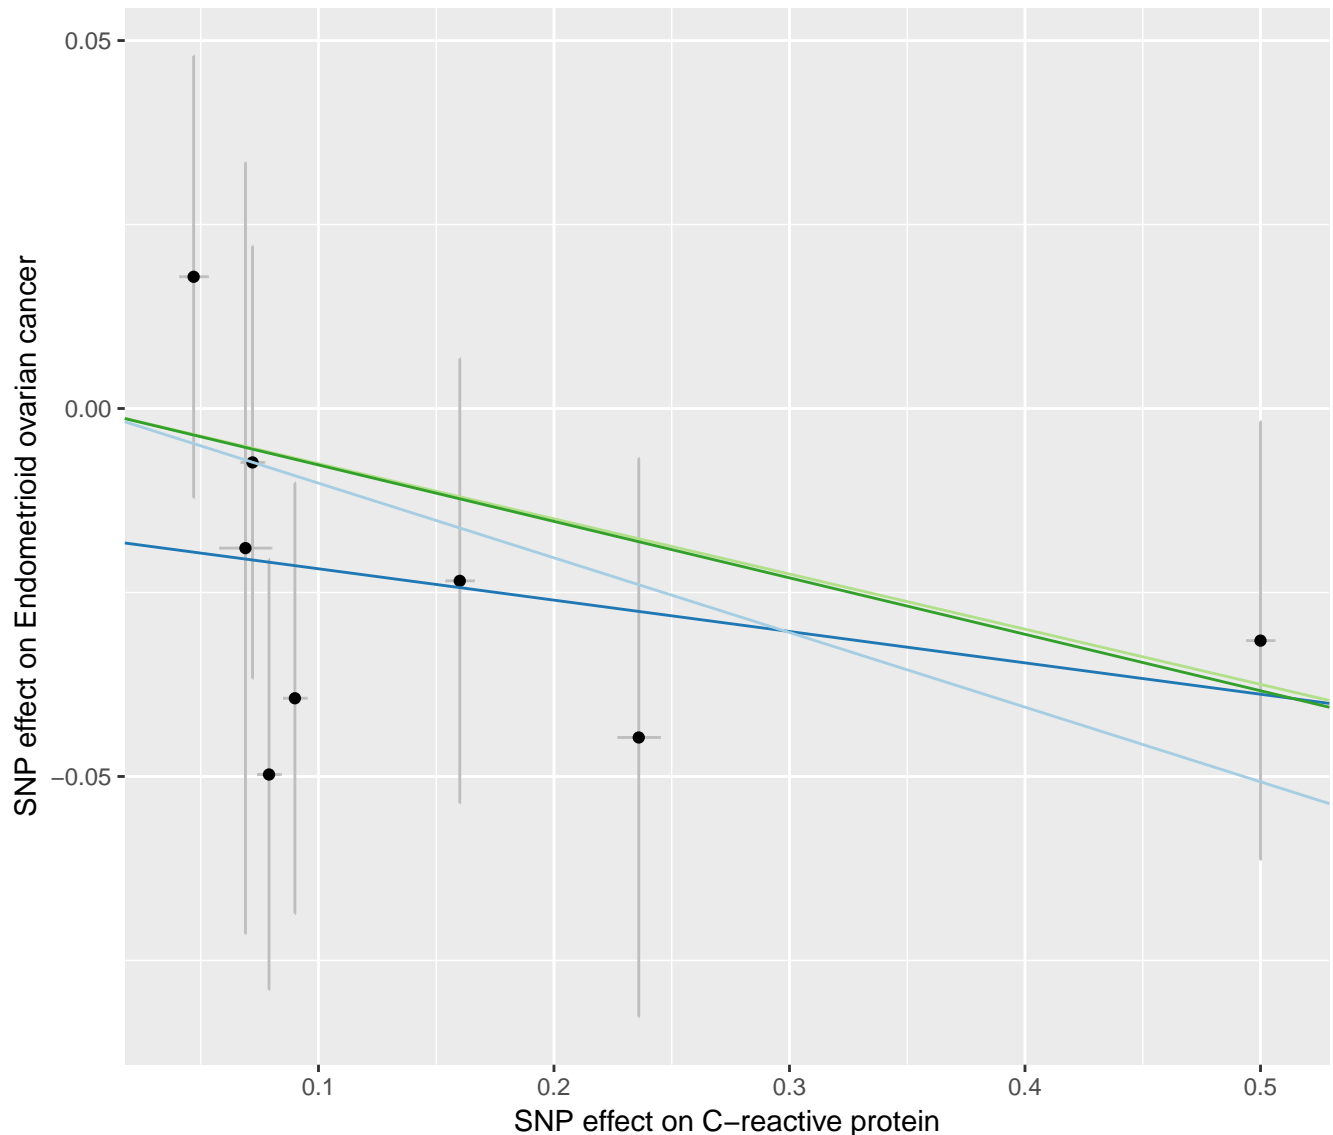

Supplement: pmed.1002893.s002.pdf [file pmed.1002893.s002.pdf]
