# Supplementary material for: Appraising the role of previously reported risk factors in epithelial ovarian cancer risk: A Mendelian randomization analysis
Source: PubMed Central journal article supplement (PMC6685606; doi:10.1371/journal.pmed.1002893), 2019-08-07

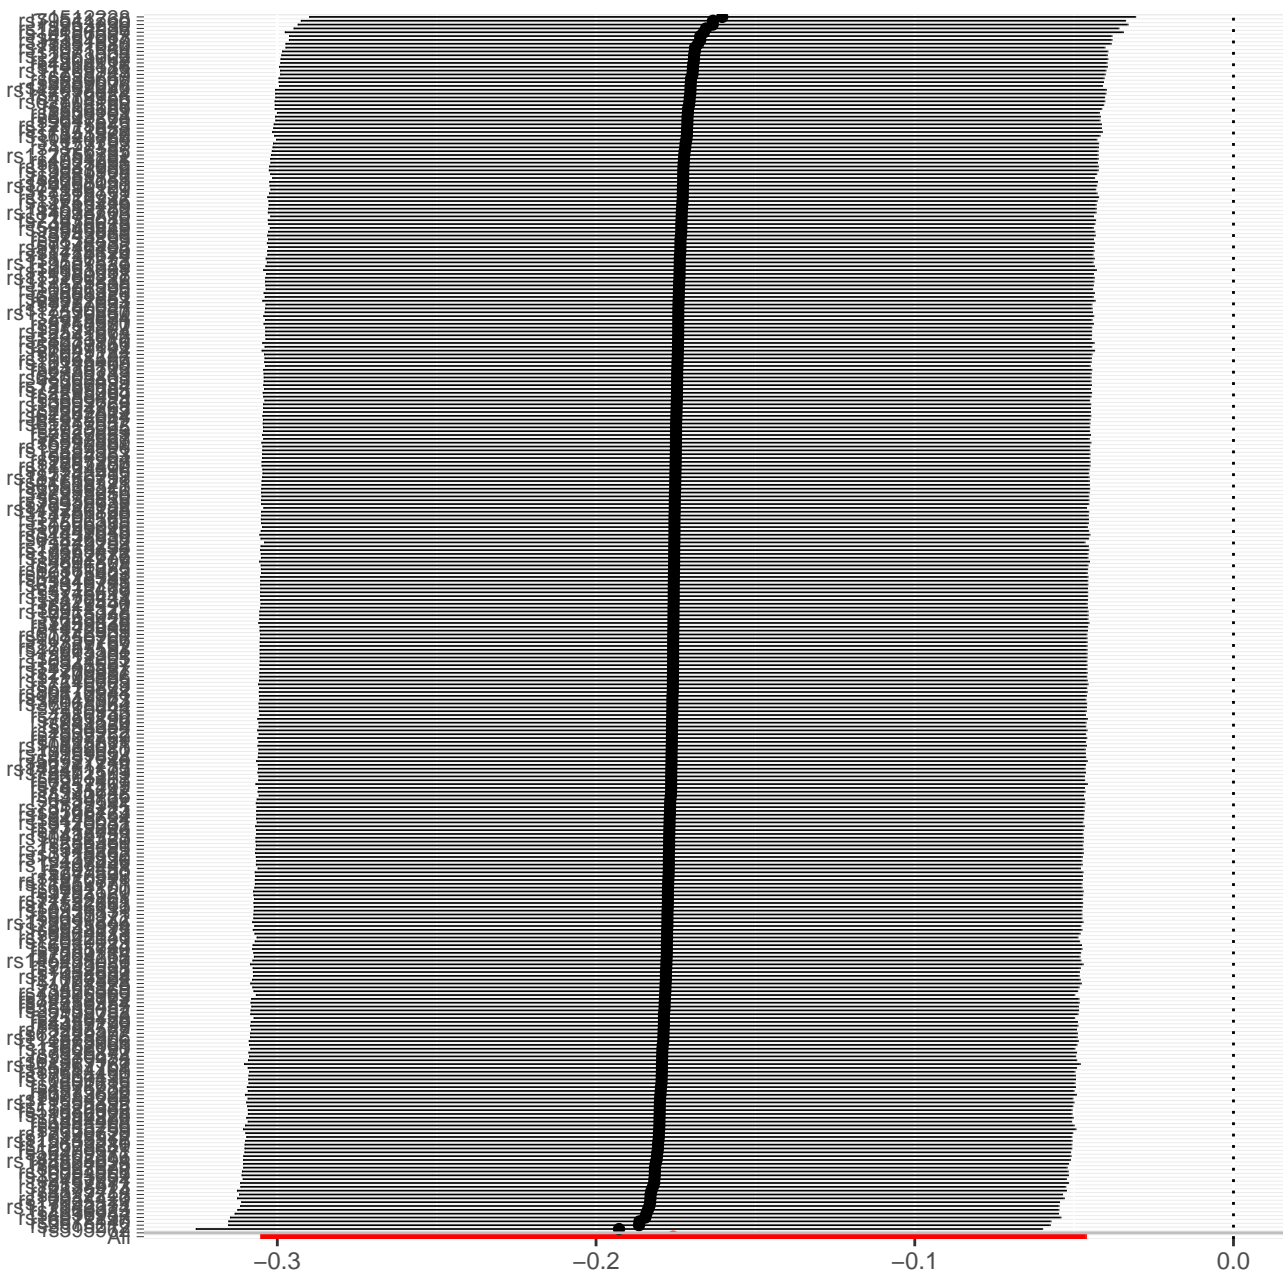

MR leave-one-out sensitivity analysis for 'Age at menarche' on 'Endometrioid ovarian cancer'

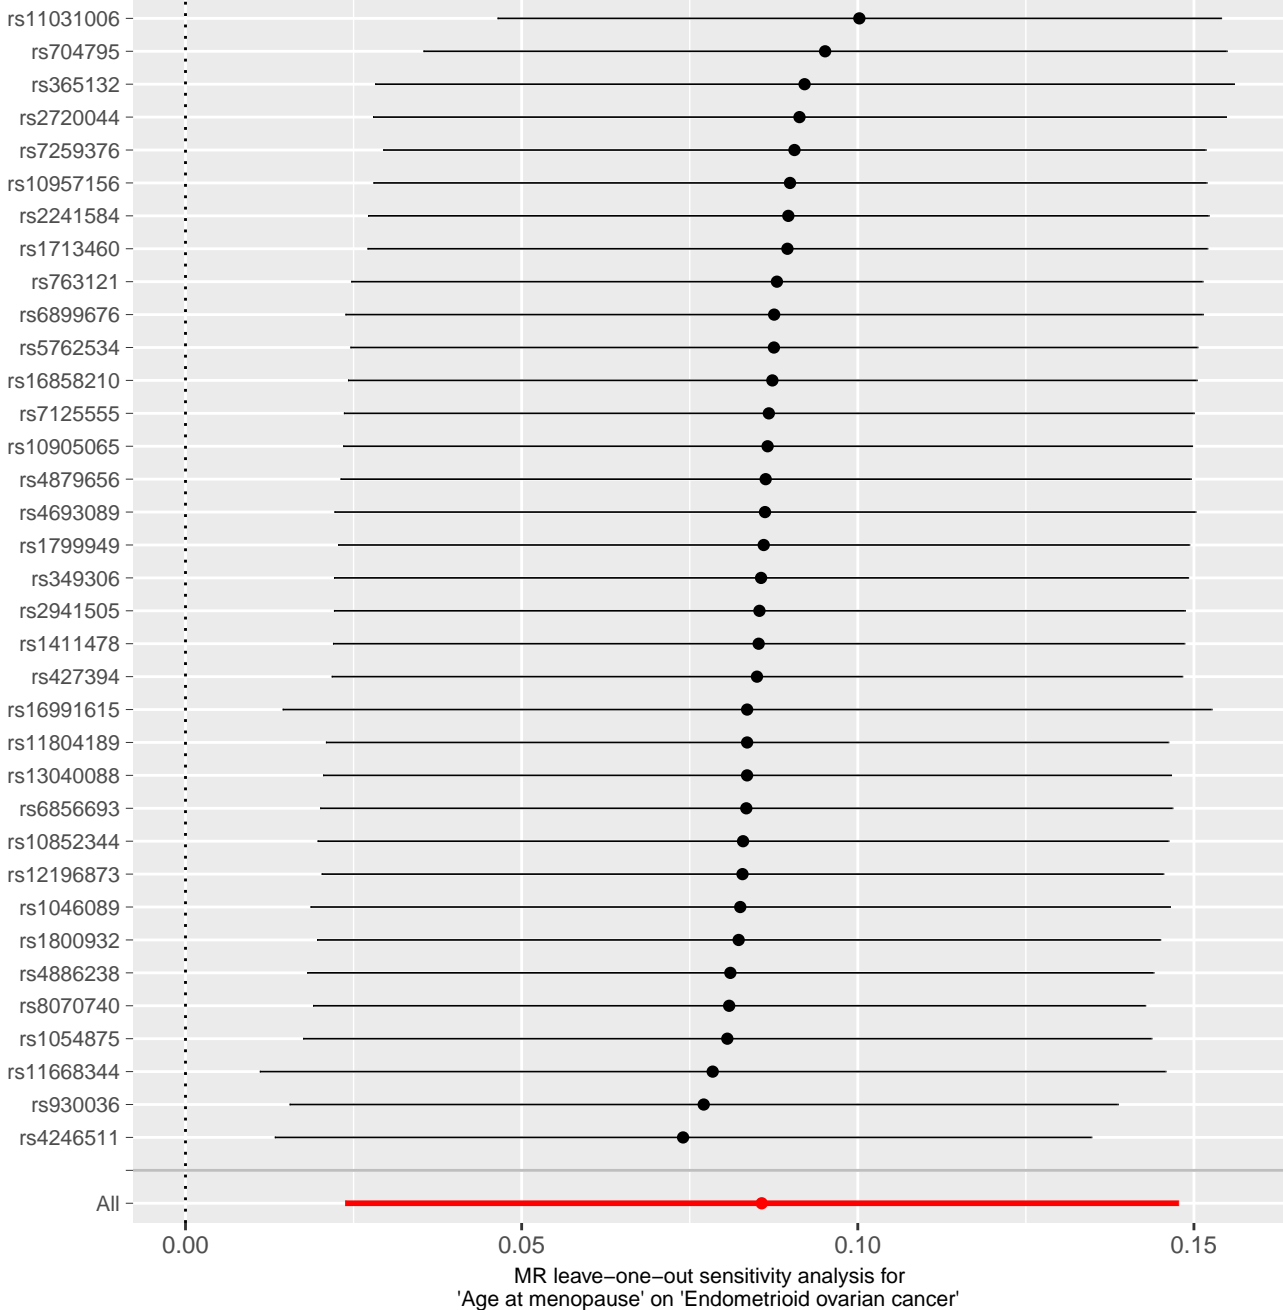

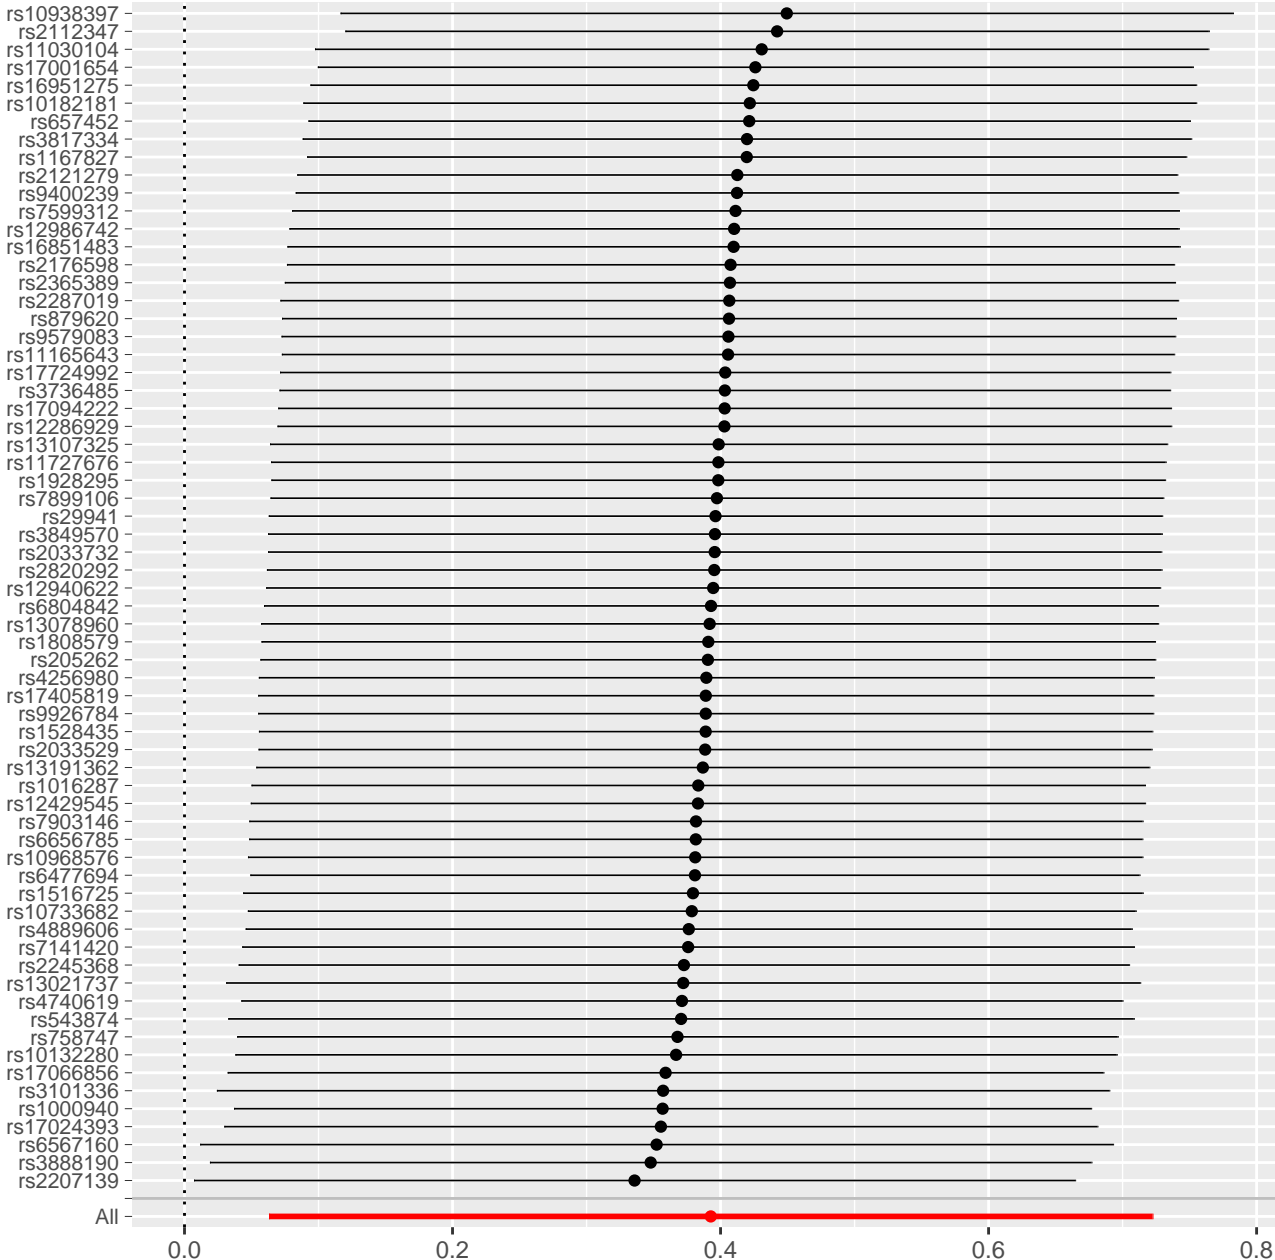

MR leave-one-out sensitivity analysis for 'Body mass index' on 'Endometrioid ovarian cancer'

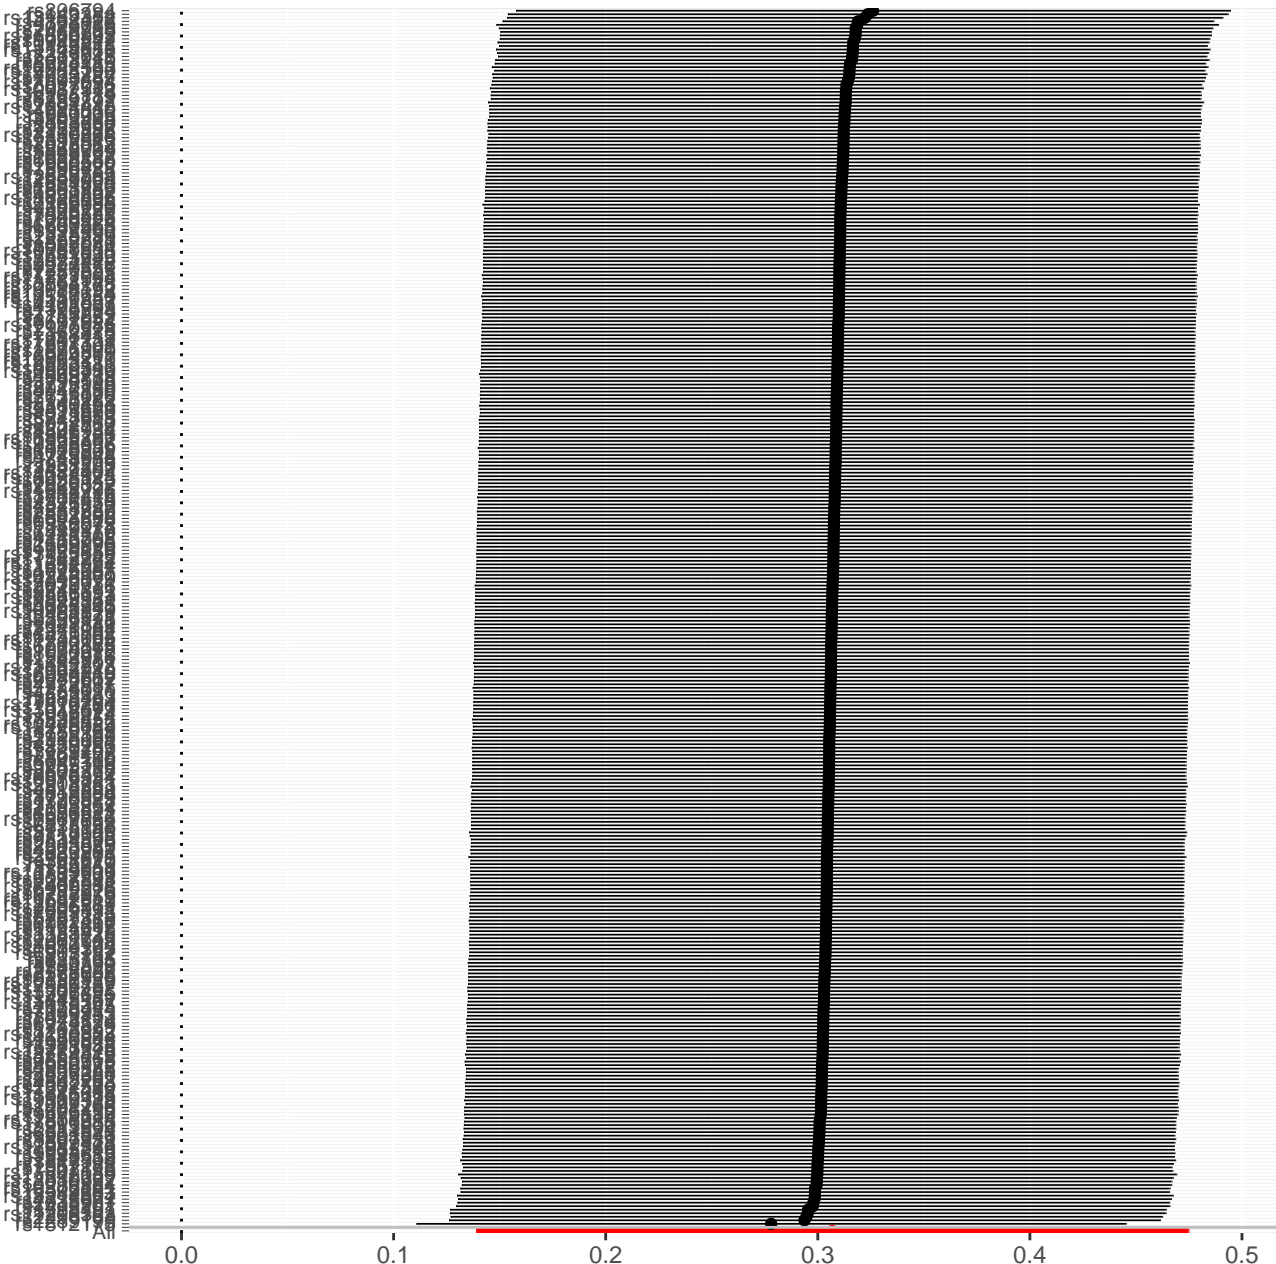

MR leave-one-out sensitivity analysis for 'Height' on 'Clear cell ovarian cancer'

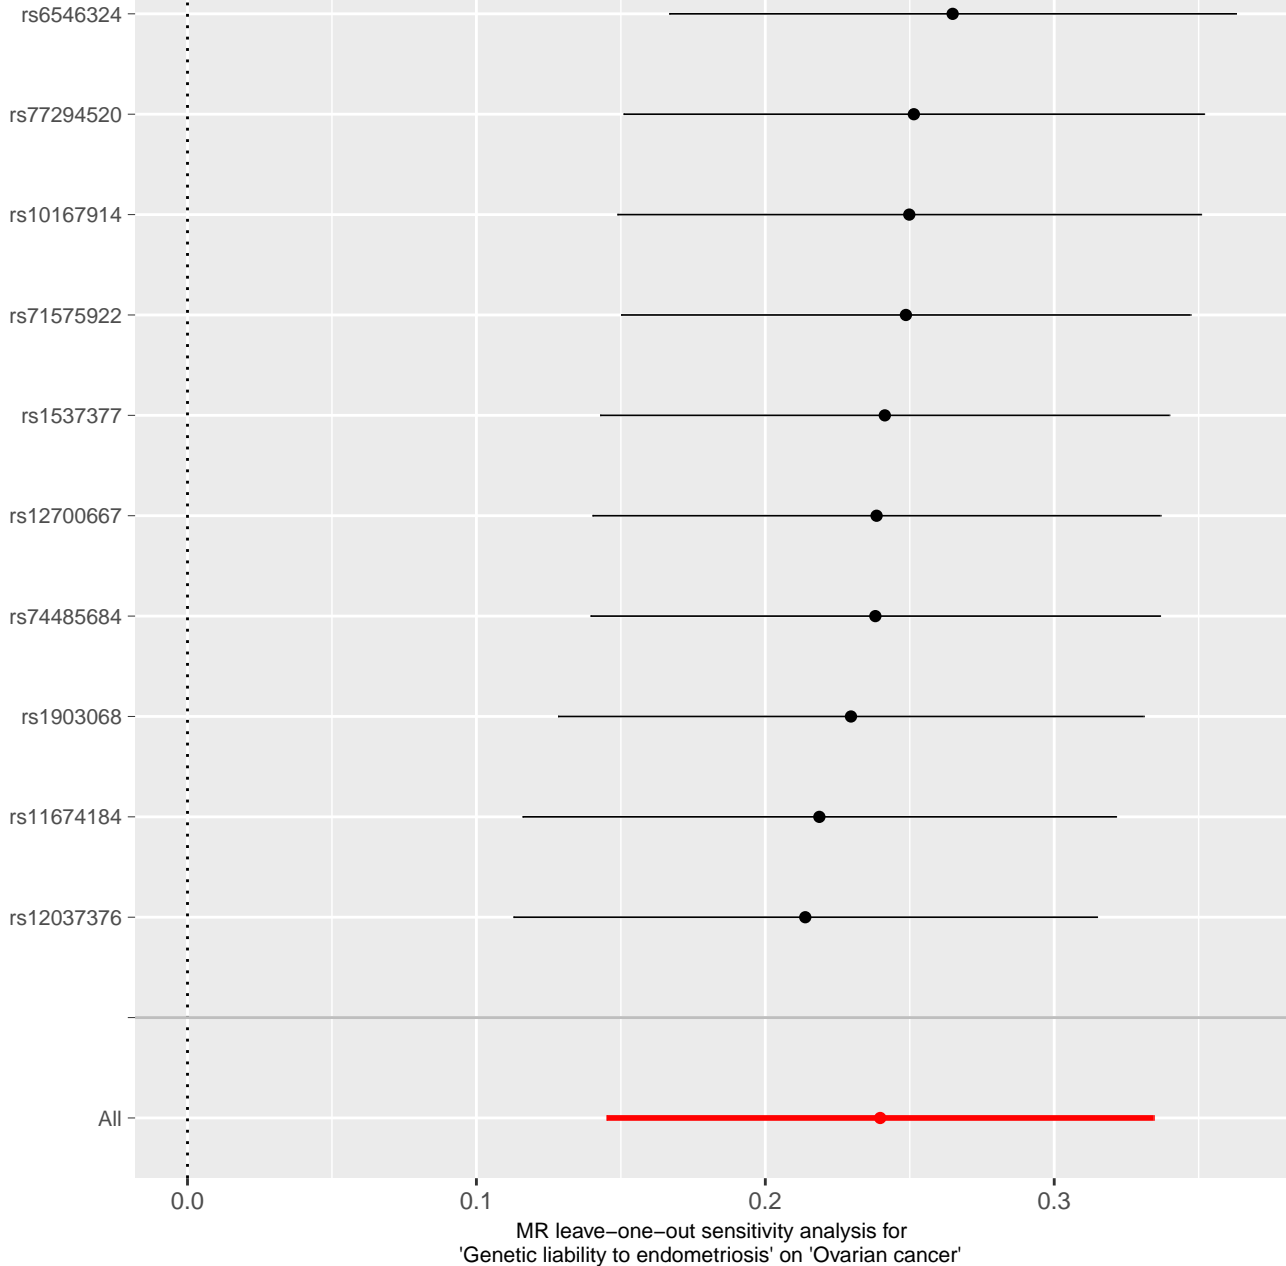

rs6546324

rs77294520

rs1537377

rs74485684

rs12037376

rs11674184

rs12700667

rs1903068

rs71575922

rs10167914

All

0.0

0.5

1.0

1.5

MR leave-one-out sensitivity analysis for 'Genetic liability to endometriosis' on 'Clear cell ovarian cancer'

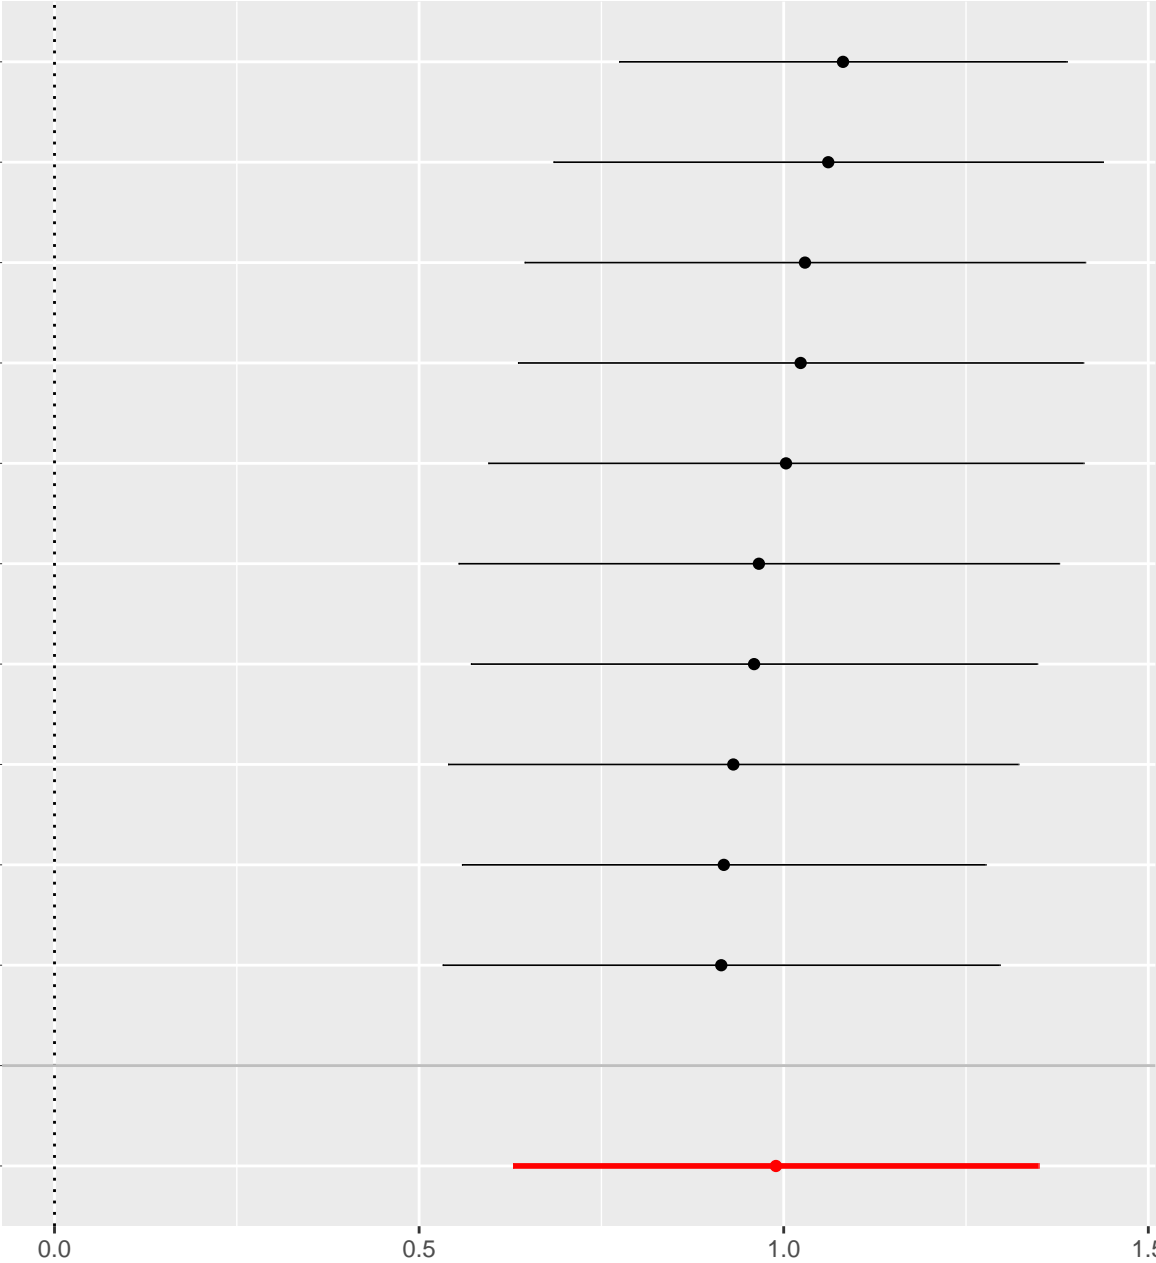

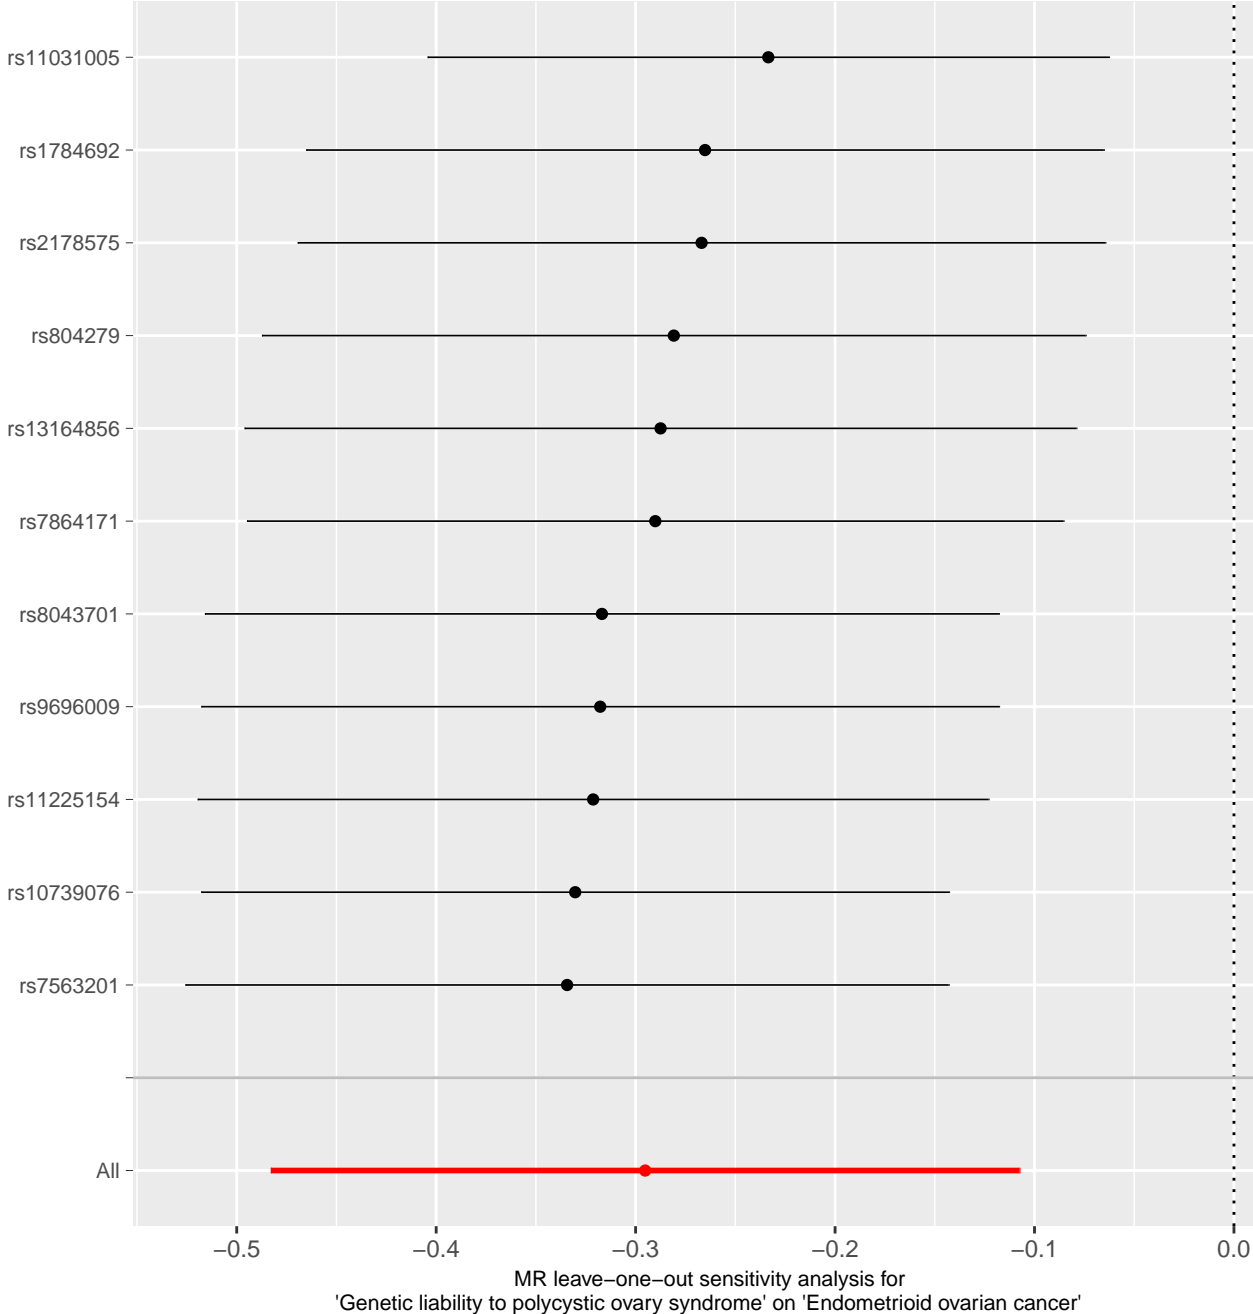

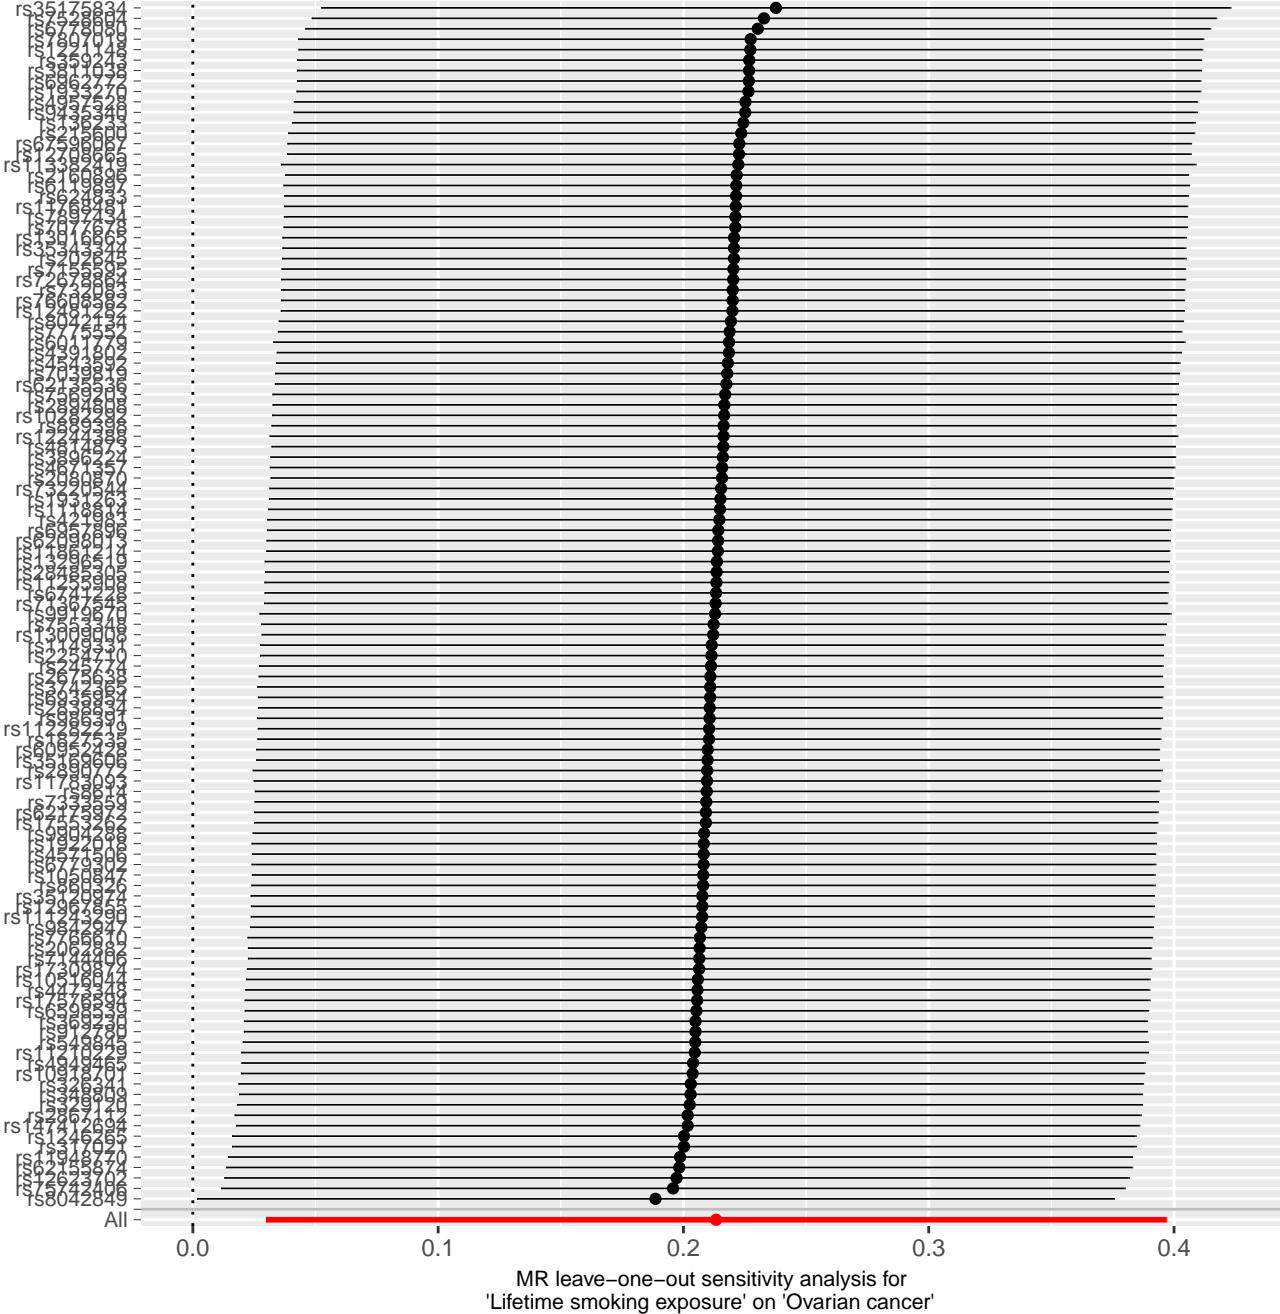



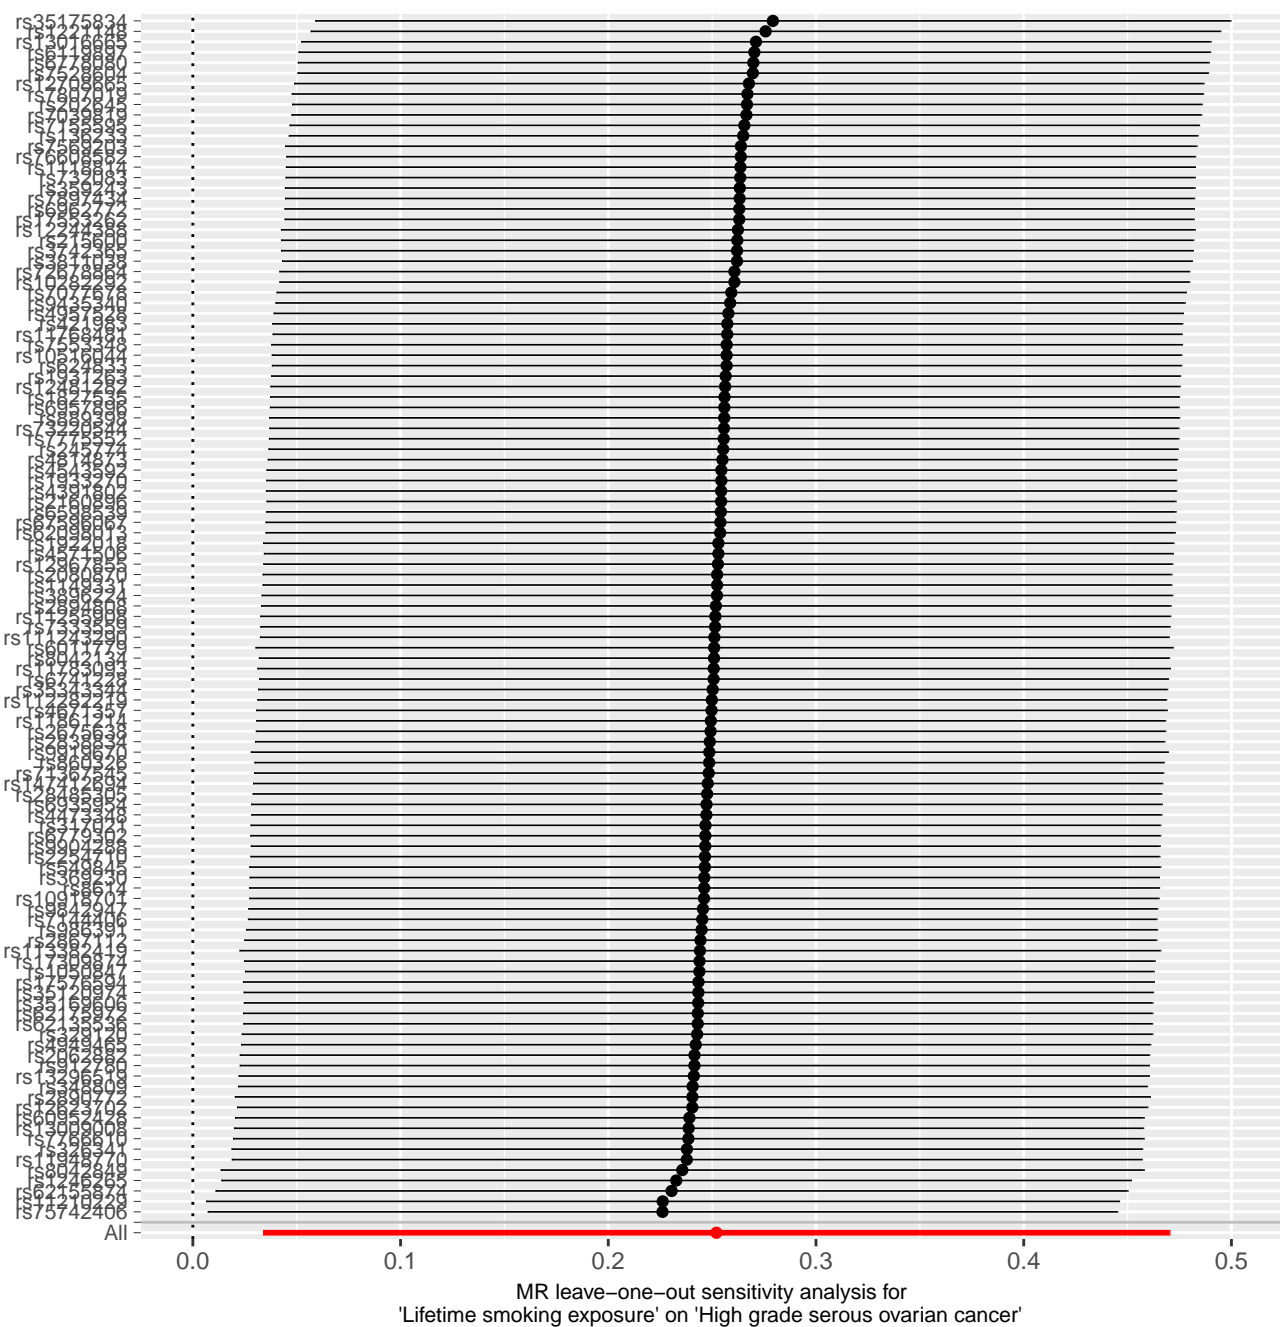

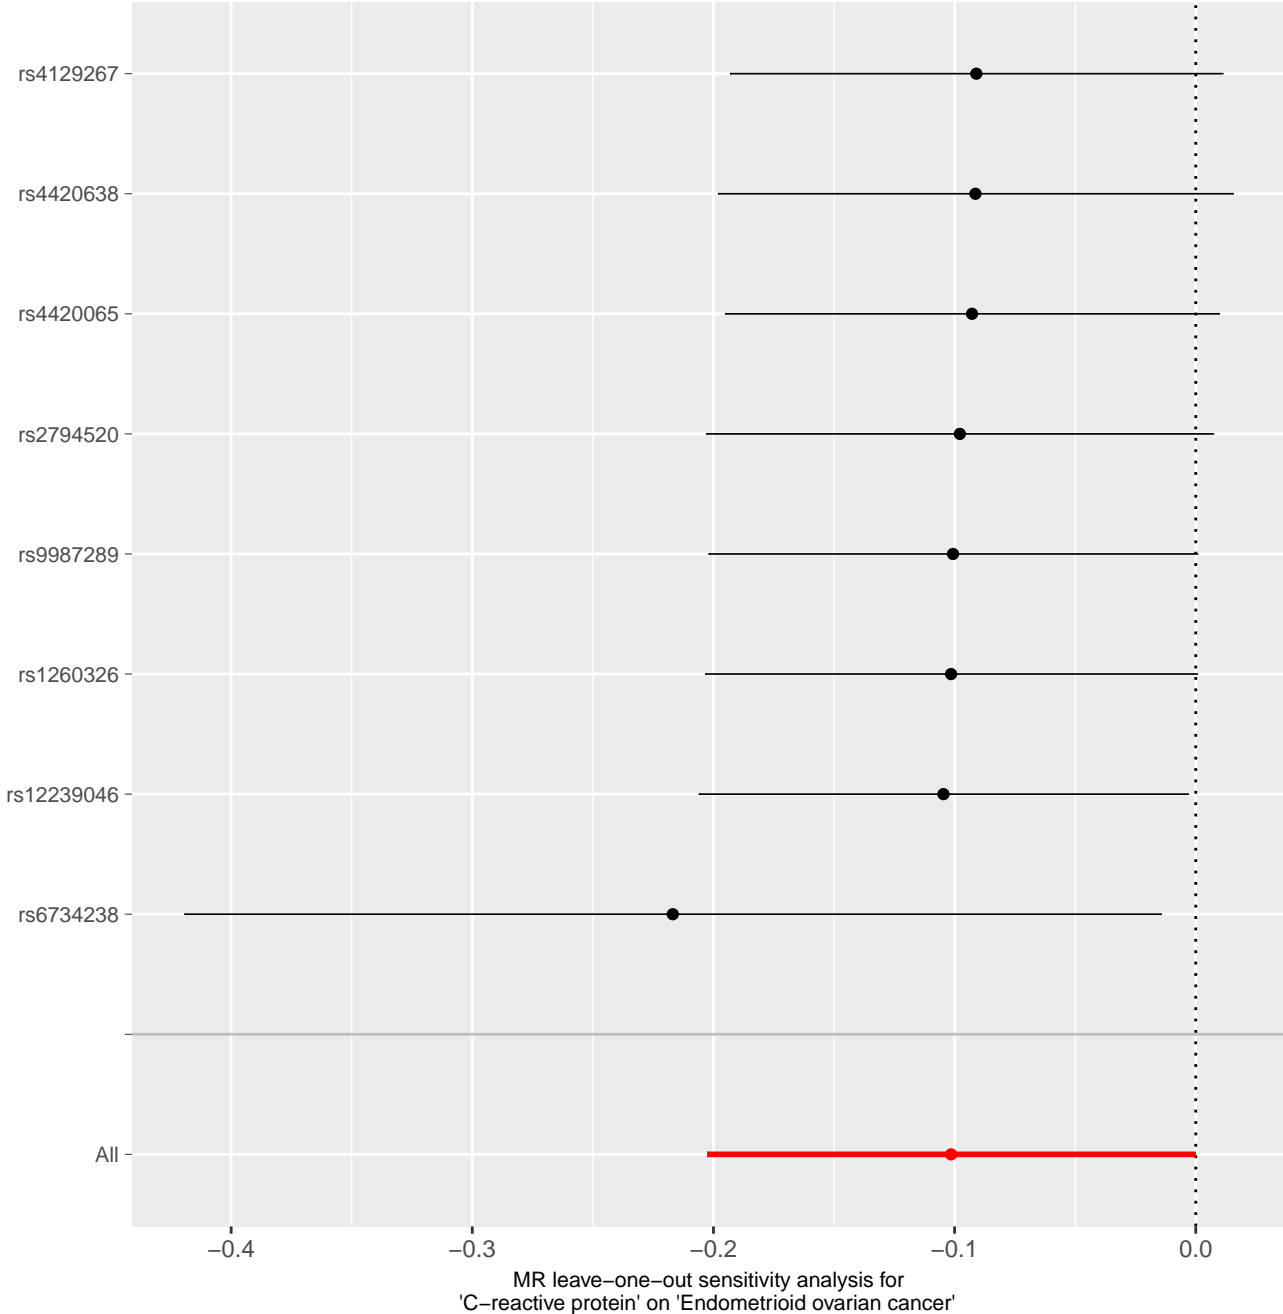

Supplement: pmed.1002893.s003.pdf [file pmed.1002893.s003.pdf]
